# Supplementary material
Source: HighWire-hosted journal article supplement (https://bmjopen.bmj.com/content/10/5/e032002)
Supplement: inline-supplementary-material-1 [file inline-supplementary-material-1.pdf]

方案版本号及日期：PP06 2019-01-09

知情同意书版本号及日期：ICF03 2018-11-22

## 气腹预适应对腹腔镜肾部分切除术后肾脏的保护作用：双盲随机对照试验

# 知情同意书

尊敬的患者：

我们将邀请您参加一项临床研究。本知情同意书提供给您一些信息以帮助您决定是否参加此项临床研究。请您仔细阅读，如有任何疑问请向负责该项研究的研究者提出。

您参加本项研究是自愿的。本次研究已通过南京市第一医院伦理委员会审查。

如果您愿意，请仔细阅读以下内容。

方案名称：气腹预适应对腹腔镜肾部分切除术后肾脏的保护作用：双盲随机对照试验

方案版本号与日期：PP06 2019-01-09

知情同意书版本号与日期：ICF03 2018-11-22

研究中心：南京市第一医院

主要研究者：贾瑞鹏

### 一、研究目的

肾部分切除术在完整切除肾脏肿瘤的基础上可以最大限度保留肾功能，是目前治疗肾脏肿瘤的主要术式。与传统开放手术相比，腹腔镜肾部分切除术（Laparoscopic partial nephrectomy，简称 LPN）具有创伤更小、恢复更快的优点。但在目前技术条件限制，LPN 术中大都需阻断肾动脉，这不可避免地会导致肾脏缺血再灌注损伤（Ischemia reperfusion injury，简称 IRI）的发生，影响术后肾功能的恢复。国内外研究者对肾脏 IRI 的保护策略进行了不断探索，然而大多数方法实施起来较为复杂。因此，亟需一种有效可行的措施以改善 LPN 后肾功能的损伤。

缺血预处理是一种新型的非药物干预措施，在靶器官或组织长时间缺血之前，进行短暂的局部缺血再灌注预处理，可有效减轻靶器官或组织的 IRI，并已证实可显著改善肾脏 IRI。然而，在肾脏手术中提前夹闭肾动脉，临床实施难度较大，亦会增加手术风险。气腹预处理（Pneumoperitoneum preconditioning，简称 PP）是另一种形式的缺血预处理，在 LPN 长时间腹腔充气前，通过对腹腔进行短暂间歇的机械充气和放气而实现的，相对于原始缺血预处理更加的安全可行。

因此，我们设计了一项随机对照试验以评估 PP 对肾肿瘤患者 LPN 术后的短期和长期肾脏保护作用。

### 二、参试人员条件

需符合下列条件：年龄≥18 周岁；接受 LPN 的肾脏肿瘤患者；肾脏肿瘤临床分期为 T1 期，直径≤4cm；单侧肾脏肿瘤，对侧肾脏未缺如，且功能正常；没有严重的心肺功能障碍；没有伴发其他恶性肿瘤；一年内没有腹腔脏器手术史；没有肾移植手术史。

方案版本号及日期: PP06 2019-01-09

知情同意书版本号及日期: ICF03 2018-11-22

### 三、研究过程

如果您同意参与这项研究,我们将对每位受试者进行编号,并随机分到对照组(术中不实施 PP 干预)或实验组(术中实施 PP 干预)。分配到实验组的患者,在 LPN 术前,将由一位泌尿外科医师和一位气腹机操作员进行 PP 干预,患者麻醉稳定后,植入气腹针并连接全自动气腹机,予以 3 个循环的充气(5 分钟)+放气(5 分钟)处理,气腹使用 CO<sub>2</sub> 气体,压力维持在 15 mmHg,整个过程约 30 分钟;而分配到对照组的患者,麻醉稳定后以同样的方式植入气腹针,但无腹腔充放气操作,整个过程亦持续 30 分钟。

预计参加实验人数共为 86 人,所有受试者均会建立病历档案。本次实验随访时间为 6 个月,在研究过程中我们需要采集一些您的血液标本(胳膊上抽取静脉血),采血时间点包括入院时及术后 12 小时、24 小时、48 小时、1 个月和 6 个月,共 6 次,将由专业人员为您取样,您的样本仅用于本中心的研究。此外,还需要对您的双侧肾脏进行放射性核素显像检测,检测时间点为入院时、术后 1 个月及术后 6 个月,届时将有专业人员带领。

### 四、风险与不适

对于您来说,所有的信息将是保密的。您的样本采集将严格按照无菌要求操作,标本的采集可能会有一些非常小的风险,包括短暂的疼痛、局部青紫,少数人会有轻度头晕,或极为罕见的针头感染。放射性核素显像检测,需要提前注射显像剂,具有一定的放射性,但剂量较低,会随着人体排泄逐渐完全排出体外。注射显像剂后可能有发烧、面部潮红、心率加快等轻度不良反应。

### 五、受益

通过 PP 干预,理论上会对您 LPN 术后的肾脏产生保护作用,促进术后肾功能的恢复。通过对您的标本进行检测将有助于对肾功能的损伤程度作出更为细致的评估,为您的治疗提供必要的建议,并为疾病的研究提供有益的信息。需要注意的是,PP 干预并不是保护 LPN 术后肾脏的唯一选择,也不能保证对您肯定有效。

### 六、责任

作为受试者,您有以下职责:按照医生和您约定的时间来医院完成随访和各项检查;提供有关自身病史和当前身体状况的真实情况;告诉研究医生自己在本次研究期间所出现的任何不适;不得服用受限制的药物、食物等;告诉研究医生自己在最近是否曾参与其他研究,或目前正参与其他研究。

### 七、费用问题

在本项研究过程中,与本研究相关的各项结局指标的检查费用,均由本中心承担;您需要承担除上述检查费以外的其他住院费用。我们将竭尽全力预防由于本研究可能带来的伤害,若在临床试验中出现不良事件,并经医学专家委员会鉴定与本研究有关,我们将按照规

---

方案版本号及日期：PP06 2019-01-09知情同意书版本号及日期：ICF03 2018-11-22

---

定对实验相关的损害提供治疗的费用，并根据不良反应程度给予您相应的经济补偿。对于您同时合并的其他疾病所需的治疗和检查，将不在免费的范围之内。

## 八、隐私问题

如果您决定参加本项研究，您参加试验及在试验中的个人资料均属保密。您的血/尿/病理标本将以研究编号数字而非您的姓名加以标识。可以识别您身份的信息将不会透露给研究小组以外的成员，除非获得您的许可。所有的研究成员和研究申办方都被要求对您的身份保密。您的档案将保存在有锁的档案柜中，仅供研究人员查阅。为确保研究按照规定进行，必要时，政府管理部门或伦理审查委员会的成员按规定可以在研究单位查阅您的个人资料。这项研究结果发表时，将不会披露您个人的任何资料。

除本研究以外，有可能在今后的其他研究中会再次利用您的医疗记录、血/尿/病理检查标本。您现在也可以声明拒绝除本研究外的其他研究利用您的医疗记录和病理标本。

## 九、权利

如果您因参与这项研究而受到伤害：如发生与该项临床研究相关的损害时，您可以获得免费治疗和/或相应的补偿。

您可以选择不参加本项研究，或者在任何时候通知研究者要求退出研究，您的数据将不纳入研究结果，您的任何医疗待遇与权益不会因此而受到影响。

如果您需要其它治疗，或者您没有遵守研究计划，或者发生了与研究相关的损伤或者有任何其它原因，研究医师可以终止您继续参与本项研究。

您可随时了解与本研究有关的信息资料和研究进展，如果您有与本研究有关的问题，或您在研究过程中发生了任何不适与损伤，或有关于本项研究参加者权益方面的问题您可以随时与研究者的联系。

受试者同意声明

我已经阅读了本知情同意书。

我有机会提问而且所有问题均已得到解答。

我理解参加本项研究是自愿的。

我可以选择不参加本项研究，或者在任何时候通知研究者后退出而不会遭到歧视或报复，我的任何医疗待遇与权益不会因此而受到影响。

如果我需要其它治疗，或者我没有遵守研究计划，或者发生了与研究相关的损伤或者有任何其它原因，研究医师可以终止我继续参与本项研究。

我将收到一份签过字的知情同意书副本。

最后，我决定同意参加本项研究。

受试者签名：\_\_\_\_\_  签名日期：\_\_\_\_\_年\_\_\_\_月\_\_\_\_日

受试者联系电话：\_\_\_\_\_

我已准确地将这份文件告知受试者，他/她准确地阅读了这份知情同意书，并证明该受试者有机会提出问题。我证明他/她是自愿同意的。

研究者签名：\_\_\_\_\_  签名日期：\_\_\_\_\_年\_\_\_\_月\_\_\_\_日

研究者联系电话：\_\_\_\_\_
